# Supplementary material
Source: publisher figshare collection journal article supplement (https://springernature.figshare.com/ndownloader/files/13673705)
Supplement: Supplementary file [file 13673705]

Additional file 2  
Table of Excluded Citations

| Author      | Date | Title                                                                                                                                                                                      | Include/exclude | Reason for exclusion      |
|-------------|------|--------------------------------------------------------------------------------------------------------------------------------------------------------------------------------------------|-----------------|---------------------------|
| Beverly     | 2013 | <i>Explaining Patients' Responses to Diabetes Education: A Qualitative Study.</i> Diabetes et al.                                                                                          | exclude         | T1DM and T2DM             |
| Bianchi     | 2011 | <i>Motivating type 1 diabetic patients to learn carbohydrate counting through a cultural/aesthetic experience.</i> Diabetologia et al.                                                     | abstract        | Insufficient data         |
| Buysschaert | 1987 | <i>Effect of an inpatient education programme upon the knowledge behaviour and glycemic control of insulin-dependent diabetic patients.</i> . Diabetes & Metabolism et al.                 | exclude         | Quantitative study        |
| Cagle       | 2002 | <i>Practitioners' actions inhibited patient participation in self care decision making.</i> Evidence Based Nursing                                                                         | exclude         | Not participated in a SEP |
| Cameron     | 2016 | <i>Self-monitoring of blood glucose in insulintreated diabetes: A case study of patients</i> and F. Harris J.M.M. Evans                                                                    | exclude         | Not participated in a SEP |
| Cheyette    | 2012 | <i>Early changes in glycated haemoglobin (HbA1c) can be used to predict glycaemic outcomes at 1 year following the Dose Adjustment for Normal Eating (DAFNE) course.</i> Diabetic Medicine | exclude         | Quantitative study        |
| Cooke       | 2013 | <i>Linguistic and psychometric validation of the Diabetes-Specific Quality-of-Life Scale in U.K. English for adults with type 1 diabetes.</i> Diabetes care et al.                         | Exclude         | Not a qualitative study   |
| Davis       | 2007 | <i>Social Identity Theory and Telehealth: A New Behavioral Approach to Frame Diabetes Self-Management.</i> Diabetes                                                                        | abstract        | Insufficient data         |
| Davis       | 2012 | <i>Identifying provider and patient viewpoints in developing a diabetes selfmanagement guide.</i> Journal of Investigative Medicine et al.                                                 | exclude         | T2DM                      |
| Fairfield   | 2014 | <i>Getting there': The impact of structured insulin management education in a high ethnic mix population with type 1 and type 2 diabetes.</i> Practical Diabetes and J. James S. Amin      | exclude         | Quantitative study        |
| Fortin      | 2017 | <i>Practices perceptions and expectations for carbohydrate counting in patients with type 1 diabetes - Results from an online survey.</i> Diabetes Research & Clinical Practice et al.     | exclude         | Web based questionnaire   |
| Gilbert     | 2012 | <i>Online communities are valued by people with type 1 diabetes for peer support: How well do health professionals understand this?</i> Diabetes Spectrum et al.                           | exclude         | Not attended a SEP        |
| Glindorf    | 2012 | <i>Effect of a 5 days intervention programme for people with type 1 diabetes and severe hypoglycaemia.</i> Diabetologia                                                                    | abstract        | Insufficient data         |
| Gundupalli  | 2010 | <i>Effect of Family Support and Education on Diabetes Self Management in Cuban Americans.</i> Faseb Journal and F.G. Huffman J. Vaccaro                                                    | abstract        | Insufficient data         |

|           |      |                                                                                                                                                                                                                               |          |                           |
|-----------|------|-------------------------------------------------------------------------------------------------------------------------------------------------------------------------------------------------------------------------------|----------|---------------------------|
| Harris    | 2017 | <i>Barriers to attendance at Dose Adjustment for Normal Eating (DAFNE) in South London: A qualitative study.</i> Diabetic Medicine and S.A. Amiel H. Mulnier                                                                  | exclude  | Postal/screening survey*  |
| Harris    | 2016 | Marketing Dose Adjustment For Normal Eating (DAFNE): Exploring perceived barriers to attendance in Healthcare professionals (HCP) and adults with Type 1 diabetes. Diabetic Medicine et al.                                   | exclude  | Not attended a SEP        |
| Harry     | 2013 | <i>[Time and use of discussion forums in type 1 diabetes: contribution to patient education].</i> Temporalite et usage des forums asynchrones dans le diabete de type 1. Contribution a l'Education therapeutique du patient. | exclude  | Not participated in SEP   |
| Helme     | 2004 | <i>Patient accounts for noncompliance with diabetes self-care regimens and physician compliance-gaining response.</i> Patient education and counseling                                                                        | exclude  | surveys                   |
| Hinder    | 2012 | "This does my head in". Ethnographic study of self-management by people with diabetes. BMC health services research                                                                                                           | exclude  | T1DM and T2DM             |
| Kramer    | 2013 | <i>Which principles patients with diabetes type 1 use for self-adjustment of insulin dose?</i> Diabetologia et al.                                                                                                            | abstract | Insufficient data         |
| Lehmann   | 2000 | <i>User experience with the AIDA interactive educational virtual diabetes patient simulator.</i> Diabetes technology & therapeutics                                                                                           | absract  | Not participated in a SEP |
| Lucherini | 2016 | <i>Performing Diabetes: Felt Surveillance and Discreet Self-Management.</i> Surveillance & Society                                                                                                                            | exclude  | Not participated in SEP   |
| McIntyre  | 2014 | <i>Dose adjustment for normal eating: A role for the expert patient?</i> Diabetes and Metabolism Journal                                                                                                                      | exclude  | Descriptive study         |
| McIntyre  | 2006 | <i>DAFNE (Dose Adjustment for Normal Eating): structured education in insulin replacement therapy for type 1 diabetes.</i> The Medical journal of Australia                                                                   | exclude  | editorial                 |
| Mullan    | 2012 | <i>Exploring the experiences of adults living with type 1 diabetes accessing care.</i> Canadian Journal of Diabetes et al.                                                                                                    | exclude  | Not participated in a SEP |
| O'Hara    | 2013 | A cross country qualitative investigation of structured education programmes for adults with type 1 diabetes. Diabetologia                                                                                                    | exclude  | abstract                  |
| O'Kane    | 2016 | <i>Individual differences and contextual factors influence the experience and practice of self-management with type 1 diabetes technologies.</i> Diabetes Technology and Therapeutics                                         | exclude  | Not participated in a SEP |
| Oliver    | 2009 | <i>The DAFNE Collaborative: Experiences of developing a nationally delivered evidence-based quality-assured programme for people with type 1 diabetes.</i> Practical Diabetes International                                   | exclude  | Not a qualitative study   |

|                |      |                                                                                                                                                                                                                |         |                                  |
|----------------|------|----------------------------------------------------------------------------------------------------------------------------------------------------------------------------------------------------------------|---------|----------------------------------|
| Oliver         | 2011 | <i>Carbohydrate counting in diabetes</i> . Nursing times                                                                                                                                                       | exclude | editorial                        |
| Ozcan          | 2012 | Redesigning an intensive insulin service for patients with Type 1 diabetes: A patient engagement exercise. Diabetic Medicine et al.                                                                            | exclude | Not attended a SEP               |
| Rasmussen      | 2007 | <i>Young women with diabetes: using Internet communication to create stability during life transitions</i> . Journal of P. Dunning                                                                             | exclude | Not attended a SEP               |
| Richard        | 1989 | <i>ATTITUDES OF INSULIN-DEPENDENT DIABETICS TOWARDS THEIR DISEASE FOLLOWING A ONE-WEEK EDUCATION-PROGRAM</i> . Semaine Des Hopitaux                                                                            | exclude | French language                  |
| Rosenbek Minet | 2011 | The experience of living with diabetes following a self-management program based on motivational interviewing. Qualitative health research et al.                                                              | exclude | Not all had attended a SEP       |
| Sacco          | 2012 | <i>Educational attainment moderates the effect of a brief diabetes self-care intervention</i> . Diabetes research and clinical practice et al.                                                                 | exclude | Not part of a SEP                |
| Savin          | 2013 | <i>Empowering young women with type 1 diabetes: Evaluating a peer-led diabetes support group</i> . Diabetes                                                                                                    | exclude | Not participated in a SEP        |
| Schaefer       | 2014 | Strategies for Improving Participation in Diabetes Education. A Qualitative Study. Plos One et al.                                                                                                             | exclude | Not attended a SEP               |
| Shepard        | 2012 | <i>Patient perspectives on personalized glucose advisory systems for type 1 diabetes management</i> . Diabetes technology & therapeutics et al.                                                                | exclude | Not participated in a SEP        |
| Simon          | 2014 | <i>Diabetes patients' experiences with the implementation of insulin therapy and their perceptions of computer-assisted self-management systems for insulin therapy</i> . Journal of medical Internet research | exclude | T2DM                             |
| Stadler        | 2014 | DAFNE-HART a psycho-educational programme to reverse hypoglycaemia unawareness in Type 1 diabetes: Report on sustained biomedical benefit at 1 year                                                            | exclude | Quantitative results             |
| Storni         | 2014 | <i>Diabetes self-care in-the-wild: Design challenges for personal health record systems and self-monitoring technologies</i> . Information Technology & People                                                 | exclude | No evidence of attending a SEP   |
| Trief          | 2003 | <i>Describing support: A qualitative study of couples living with diabetes</i> . Families e                                                                                                                    | exclude | No evidence of attending a SEP   |
| Waite          | 2013 | <i>Mobile phone applications and type 1 diabetes: An approach to explore usability issues and the potential for enhanced self-management</i> . Diabetes & Primary Care                                         | exclude | No evidence of SEP               |
| Willaing       | 2013 | <i>Exploring diabetes education and information: perspectives of people with diabetes (DAWN2 study)</i> . Diabetologia                                                                                         | exclude | Abstract, T1DM and T2DM          |
| Wilson         | 2009 | Behavioural change in type 1 diabetes self-management: Why and how? Health Education Journal                                                                                                                   | include | Not attended a SEP teaching FIIT |
